# Supplementary material
Source: publisher figshare collection journal article supplement (https://acs.figshare.com/ndownloader/files/4528510)
Supplement: Supplementary file 1 [file 4528510]

  
data_p21n 
  
_audit_creation_method            SHELXL-97 
_chemical_name_systematic 
; 
 ? 
; 
_chemical_name_common             ? 
_chemical_melting_point           ? 
_chemical_formula_moiety          ? 
_chemical_formula_sum 
 'C14 H14 Cl N O' 
_chemical_formula_weight          247.71 
  
loop_ 
 _atom_type_symbol 
 _atom_type_description 
 _atom_type_scat_dispersion_real 
 _atom_type_scat_dispersion_imag 
 _atom_type_scat_source 
 'C'  'C'   0.0033   0.0016 
 'International Tables Vol C Tables 4.2.6.8 and 6.1.1.4' 
 'H'  'H'   0.0000   0.0000 
 'International Tables Vol C Tables 4.2.6.8 and 6.1.1.4' 
 'N'  'N'   0.0061   0.0033 
 'International Tables Vol C Tables 4.2.6.8 and 6.1.1.4' 
 'O'  'O'   0.0106   0.0060 
 'International Tables Vol C Tables 4.2.6.8 and 6.1.1.4' 
 'Cl'  'Cl'   0.1484   0.1585 
 'International Tables Vol C Tables 4.2.6.8 and 6.1.1.4' 
  
_symmetry_cell_setting            Monoclinic 
_symmetry_space_group_name_H-M    P2(1)/n 
  
loop_ 
 _symmetry_equiv_pos_as_xyz 
 'x, y, z' 
 '-x+1/2, y+1/2, -z+1/2' 
 '-x, -y, -z' 
 'x-1/2, -y-1/2, z-1/2' 
  
_cell_length_a                    9.601(4) 
_cell_length_b                    10.575(5) 
_cell_length_c                    12.022(5) 
_cell_angle_alpha                 90.00 
_cell_angle_beta                  92.744(7) 
_cell_angle_gamma                 90.00 
_cell_volume                      1219.3(10) 
_cell_formula_units_Z             4 
_cell_measurement_temperature     296(2) 
_cell_measurement_reflns_used     1327 
_cell_measurement_theta_min       0.00 
_cell_measurement_theta_max       0.00 
  
_exptl_crystal_description        block 
_exptl_crystal_colour             colorless 
_exptl_crystal_size_max           0.27 
_exptl_crystal_size_mid           0.23 
_exptl_crystal_size_min           0.22 
_exptl_crystal_density_meas       ? 
_exptl_crystal_density_diffrn     1.349 
_exptl_crystal_density_method     'not measured' 
_exptl_crystal_F_000              520 
_exptl_absorpt_coefficient_mu     0.295 
_exptl_absorpt_correction_type    multi-scan 
_exptl_absorpt_correction_T_min   0.9234 
_exptl_absorpt_correction_T_max   0.9371
_exptl_absorpt_process_details    sadabs 
  
_exptl_special_details 
; 
 ? 
; 
  
_diffrn_ambient_temperature       296(2) 
_diffrn_radiation_wavelength      0.71073 
_diffrn_radiation_type            MoK\a 
_diffrn_radiation_source          'fine-focus sealed tube' 
_diffrn_radiation_monochromator   graphite 
_diffrn_measurement_device_type   'CCD area detector' 
_diffrn_measurement_method        'phi and omega scans' 
_diffrn_detector_area_resol_mean  ? 
_diffrn_standards_number          ? 
_diffrn_standards_interval_count  ? 
_diffrn_standards_interval_time   ? 
_diffrn_standards_decay_%         ? 
_diffrn_reflns_number             7179 
_diffrn_reflns_av_R_equivalents   0.0388 
_diffrn_reflns_av_sigmaI/netI     0.0493 
_diffrn_reflns_limit_h_min        -12 
_diffrn_reflns_limit_h_max        10 
_diffrn_reflns_limit_k_min        -10 
_diffrn_reflns_limit_k_max        14 
_diffrn_reflns_limit_l_min        -15 
_diffrn_reflns_limit_l_max        14 
_diffrn_reflns_theta_min          2.57 
_diffrn_reflns_theta_max          28.19 
_reflns_number_total              2868 
_reflns_number_gt                 1576 
_reflns_threshold_expression      >2sigma(I) 
  
_computing_data_collection        'Bruker SMART' 
_computing_cell_refinement        'Bruker SMART' 
_computing_data_reduction         'Bruker SAINT' 
_computing_structure_solution     'SHELXS-97 (Sheldrick, 1990)' 
_computing_structure_refinement   'SHELXL-97 (Sheldrick, 1997)' 
_computing_molecular_graphics     'Bruker SHELXTL' 
_computing_publication_material   'Bruker SHELXTL' 
  
_refine_special_details 
; 
 Refinement of F^2^ against ALL reflections.  The weighted R-factor wR and 
 goodness of fit S are based on F^2^, conventional R-factors R are based 
 on F, with F set to zero for negative F^2^. The threshold expression of 
 F^2^ > 2sigma(F^2^) is used only for calculating R-factors(gt) etc. and is 
 not relevant to the choice of reflections for refinement.  R-factors based 
 on F^2^ are statistically about twice as large as those based on F, and R- 
 factors based on ALL data will be even larger. 
; 
  
_refine_ls_structure_factor_coef  Fsqd 
_refine_ls_matrix_type            full 
_refine_ls_weighting_scheme       calc 
_refine_ls_weighting_details 
 'calc w=1/[\s^2^(Fo^2^)+(0.0700P)^2^+0.0000P] where P=(Fo^2^+2Fc^2^)/3' 
_atom_sites_solution_primary      direct 
_atom_sites_solution_secondary    difmap 
_atom_sites_solution_hydrogens    geom 
_refine_ls_hydrogen_treatment     constr
_refine_ls_extinction_method      SHELXL 
_refine_ls_extinction_coef        0.0073(17) 
_refine_ls_extinction_expression 
 'Fc^*^=kFc[1+0.001xFc^2^\l^3^/sin(2\q)]^-1/4^' 
_refine_ls_number_reflns          2868 
_refine_ls_number_parameters      155 
_refine_ls_number_restraints      0 
_refine_ls_R_factor_all           0.1001 
_refine_ls_R_factor_gt            0.0476 
_refine_ls_wR_factor_ref          0.1450 
_refine_ls_wR_factor_gt           0.1160 
_refine_ls_goodness_of_fit_ref    0.979 
_refine_ls_restrained_S_all       0.979 
_refine_ls_shift/su_max           0.000 
_refine_ls_shift/su_mean          0.000 
  
loop_ 
 _atom_site_label 
 _atom_site_type_symbol 
 _atom_site_fract_x 
 _atom_site_fract_y 
 _atom_site_fract_z 
 _atom_site_U_iso_or_equiv 
 _atom_site_adp_type 
 _atom_site_occupancy 
 _atom_site_symmetry_multiplicity 
 _atom_site_calc_flag 
 _atom_site_refinement_flags 
 _atom_site_disorder_assembly 
 _atom_site_disorder_group 
Cl1 Cl 0.13454(8) 0.47579(7) 0.66796(6) 0.0810(3) Uani 1 1 d . . . 
C7 C 0.1501(2) 0.0272(2) 0.57904(16) 0.0471(5) Uani 1 1 d . . . 
C6 C 0.1896(2) 0.1352(2) 0.52302(16) 0.0455(5) Uani 1 1 d . . . 
C8 C 0.2237(2) -0.0778(2) 0.53400(17) 0.0474(5) Uani 1 1 d . . . 
N1 N 0.28535(17) 0.10243(18) 0.44801(13) 0.0480(5) Uani 1 1 d . . . 
C14 C 0.0474(2) 0.0248(2) 0.66114(18) 0.0573(6) Uani 1 1 d . . . 
H14 H 0.0061 0.1013 0.6786 0.069 Uiso 1 1 calc R . . 
O1 O 0.00922(18) -0.06861(18) 0.71022(14) 0.0751(6) Uani 1 1 d . . . 
C9 C 0.3058(2) -0.0265(2) 0.45123(17) 0.0479(5) Uani 1 1 d . . . 
C3 C 0.1702(2) 0.3425(2) 0.42755(18) 0.0595(6) Uani 1 1 d . . . 
H3A H 0.1056 0.3154 0.3677 0.071 Uiso 1 1 calc R . . 
H3B H 0.1547 0.4319 0.4404 0.071 Uiso 1 1 calc R . . 
C2 C 0.1416(2) 0.2685(2) 0.53333(16) 0.0479(5) Uani 1 1 d . . . 
H2 H 0.0406 0.2673 0.5414 0.057 Uiso 1 1 calc R . . 
C13 C 0.2249(2) -0.2068(2) 0.55227(19) 0.0571(6) Uani 1 1 d . . . 
H13 H 0.1725 -0.2424 0.6073 0.069 Uiso 1 1 calc R . . 
C10 C 0.3876(2) -0.1018(3) 0.38613(19) 0.0628(7) Uani 1 1 d . . . 
H10 H 0.4420 -0.0671 0.3320 0.075 Uiso 1 1 calc R . . 
C4 C 0.3174(2) 0.3228(3) 0.3933(2) 0.0667(7) Uani 1 1 d . . . 
H4A H 0.3341 0.3750 0.3290 0.080 Uiso 1 1 calc R . . 
H4B H 0.3820 0.3489 0.4535 0.080 Uiso 1 1 calc R . . 
C1 C 0.2090(2) 0.3260(2) 0.63841(19) 0.0594(6) Uani 1 1 d . . . 
H1A H 0.3082 0.3360 0.6293 0.071 Uiso 1 1 calc R . . 
H1B H 0.1968 0.2693 0.7006 0.071 Uiso 1 1 calc R . . 
C5 C 0.3435(3) 0.1867(3) 0.36538(19) 0.0632(7) Uani 1 1 d . . . 
H5A H 0.3013 0.1678 0.2923 0.076 Uiso 1 1 calc R . . 
H5B H 0.4431 0.1723 0.3629 0.076 Uiso 1 1 calc R . . 
C12 C 0.3059(3) -0.2816(3) 0.4868(2) 0.0679(7) Uani 1 1 d . . . 
H12 H 0.3075 -0.3686 0.4979 0.082 Uiso 1 1 calc R . . 
C11 C 0.3846(3) -0.2295(3) 0.4050(2) 0.0694(8) Uani 1 1 d . . . 
H11 H 0.4370 -0.2826 0.3617 0.083 Uiso 1 1 calc R . . 
  
loop_ 
 _atom_site_aniso_label 
 _atom_site_aniso_U_11 
 _atom_site_aniso_U_22 
 _atom_site_aniso_U_33 
 _atom_site_aniso_U_23 
 _atom_site_aniso_U_13 
 _atom_site_aniso_U_12 
Cl1 0.0993(6) 0.0681(5) 0.0758(5) -0.0110(4) 0.0079(4) 0.0235(4) 
C7 0.0457(12) 0.0530(13) 0.0430(11) 0.0036(11) 0.0046(9) 0.0012(11) 
C6 0.0414(11) 0.0560(14) 0.0392(11) 0.0017(10) 0.0034(9) 0.0009(10) 
C8 0.0429(12) 0.0542(14) 0.0448(12) -0.0012(11) -0.0011(9) 0.0014(10) 
N1 0.0457(10) 0.0581(12) 0.0408(10) 0.0030(9) 0.0081(8) -0.0002(9) 
C14 0.0546(14) 0.0681(16) 0.0499(13) 0.0083(13) 0.0105(11) -0.0002(12) 
O1 0.0755(12) 0.0796(13) 0.0721(11) 0.0215(10) 0.0231(9) -0.0081(10) 
C9 0.0419(11) 0.0578(14) 0.0439(12) -0.0046(11) -0.0002(9) 0.0029(11) 
C3 0.0645(15) 0.0599(15) 0.0538(13) 0.0108(12) 0.0001(11) 0.0037(12) 
C2 0.0438(12) 0.0525(14) 0.0473(12) 0.0059(11) 0.0012(9) 0.0033(10) 
C13 0.0547(14) 0.0555(15) 0.0604(14) -0.0007(12) -0.0047(11) -0.0009(12) 
C10 0.0554(14) 0.080(2) 0.0533(14) -0.0091(13) 0.0075(11) 0.0056(13) 
C4 0.0632(16) 0.0729(19) 0.0651(16) 0.0205(14) 0.0141(12) -0.0055(13) 
C1 0.0628(15) 0.0585(16) 0.0566(14) -0.0028(12) -0.0010(11) 0.0125(12) 
C5 0.0592(14) 0.079(2) 0.0523(13) 0.0110(13) 0.0172(11) -0.0025(13) 
C12 0.0661(16) 0.0563(16) 0.0801(18) -0.0113(14) -0.0090(14) 0.0039(13) 
C11 0.0641(16) 0.074(2) 0.0701(17) -0.0249(15) -0.0017(13) 0.0165(15) 
  
_geom_special_details 
; 
 All esds (except the esd in the dihedral angle between two l.s. planes) 
 are estimated using the full covariance matrix.  The cell esds are taken 
 into account individually in the estimation of esds in distances, angles 
 and torsion angles; correlations between esds in cell parameters are only 
 used when they are defined by crystal symmetry.  An approximate (isotropic) 
 treatment of cell esds is used for estimating esds involving l.s. planes. 
; 
  
loop_ 
 _geom_bond_atom_site_label_1 
 _geom_bond_atom_site_label_2 
 _geom_bond_distance 
 _geom_bond_site_symmetry_2 
 _geom_bond_publ_flag 
Cl1 C1 1.781(2) . ? 
C7 C6 1.388(3) . ? 
C7 C14 1.429(3) . ? 
C7 C8 1.435(3) . ? 
C6 N1 1.363(2) . ? 
C6 C2 1.490(3) . ? 
C8 C13 1.382(3) . ? 
C8 C9 1.408(3) . ? 
N1 C9 1.378(3) . ? 
N1 C5 1.465(3) . ? 
C14 O1 1.216(3) . ? 
C14 H14 0.9300 . ? 
C9 C10 1.386(3) . ? 
C3 C4 1.506(3) . ? 
C3 C2 1.529(3) . ? 
C3 H3A 0.9700 . ? 
C3 H3B 0.9700 . ? 
C2 C1 1.519(3) . ? 
C2 H2 0.9800 . ? 
C13 C12 1.381(3) . ? 
C13 H13 0.9300 . ? 
C10 C11 1.370(4) . ? 
C10 H10 0.9300 . ? 
C4 C5 1.502(4) . ? 
C4 H4A 0.9700 . ? 
C4 H4B 0.9700 . ? 
C1 H1A 0.9700 . ? 
C1 H1B 0.9700 . ? 
C5 H5A 0.9700 . ? 
C5 H5B 0.9700 . ? 
C12 C11 1.382(4) . ? 
C12 H12 0.9300 . ? 
C11 H11 0.9300 . ? 
  
loop_ 
 _geom_angle_atom_site_label_1 
 _geom_angle_atom_site_label_2 
 _geom_angle_atom_site_label_3 
 _geom_angle 
 _geom_angle_site_symmetry_1 
 _geom_angle_site_symmetry_3 
 _geom_angle_publ_flag 
C6 C7 C14 124.3(2) . . ? 
C6 C7 C8 107.62(18) . . ? 
C14 C7 C8 128.0(2) . . ? 
N1 C6 C7 108.69(19) . . ? 
N1 C6 C2 121.09(19) . . ? 
C7 C6 C2 130.22(19) . . ? 
C13 C8 C9 119.4(2) . . ? 
C13 C8 C7 134.8(2) . . ? 
C9 C8 C7 105.7(2) . . ? 
C6 N1 C9 109.42(17) . . ? 
C6 N1 C5 125.8(2) . . ? 
C9 N1 C5 124.24(18) . . ? 
O1 C14 C7 125.7(2) . . ? 
O1 C14 H14 117.1 . . ? 
C7 C14 H14 117.1 . . ? 
N1 C9 C10 129.5(2) . . ? 
N1 C9 C8 108.48(18) . . ? 
C10 C9 C8 122.0(2) . . ? 
C4 C3 C2 111.37(19) . . ? 
C4 C3 H3A 109.4 . . ? 
C2 C3 H3A 109.4 . . ? 
C4 C3 H3B 109.4 . . ? 
C2 C3 H3B 109.4 . . ? 
H3A C3 H3B 108.0 . . ? 
C6 C2 C1 109.10(18) . . ? 
C6 C2 C3 110.29(18) . . ? 
C1 C2 C3 113.6(2) . . ? 
C6 C2 H2 107.9 . . ? 
C1 C2 H2 107.9 . . ? 
C3 C2 H2 107.9 . . ? 
C12 C13 C8 118.4(2) . . ? 
C12 C13 H13 120.8 . . ? 
C8 C13 H13 120.8 . . ? 
C11 C10 C9 117.1(2) . . ? 
C11 C10 H10 121.5 . . ? 
C9 C10 H10 121.5 . . ? 
C5 C4 C3 111.2(2) . . ? 
C5 C4 H4A 109.4 . . ? 
C3 C4 H4A 109.4 . . ? 
C5 C4 H4B 109.4 . . ? 
C3 C4 H4B 109.4 . . ? 
H4A C4 H4B 108.0 . . ? 
C2 C1 Cl1 111.30(16) . . ? 
C2 C1 H1A 109.4 . . ? 
Cl1 C1 H1A 109.4 . . ? 
C2 C1 H1B 109.4 . . ? 
Cl1 C1 H1B 109.4 . . ? 
H1A C1 H1B 108.0 . . ? 
N1 C5 C4 111.01(19) . . ? 
N1 C5 H5A 109.4 . . ? 
C4 C5 H5A 109.4 . . ? 
N1 C5 H5B 109.4 . . ? 
C4 C5 H5B 109.4 . . ? 
H5A C5 H5B 108.0 . . ? 
C13 C12 C11 121.2(3) . . ? 
C13 C12 H12 119.4 . . ? 
C11 C12 H12 119.4 . . ? 
C10 C11 C12 121.8(2) . . ? 
C10 C11 H11 119.1 . . ? 
C12 C11 H11 119.1 . . ? 
  
loop_ 
 _geom_torsion_atom_site_label_1 
 _geom_torsion_atom_site_label_2 
 _geom_torsion_atom_site_label_3 
 _geom_torsion_atom_site_label_4 
 _geom_torsion 
 _geom_torsion_site_symmetry_1 
 _geom_torsion_site_symmetry_2 
 _geom_torsion_site_symmetry_3 
 _geom_torsion_site_symmetry_4 
 _geom_torsion_publ_flag 
C14 C7 C6 N1 -177.64(19) . . . . ? 
C8 C7 C6 N1 -1.3(2) . . . . ? 
C14 C7 C6 C2 1.1(4) . . . . ? 
C8 C7 C6 C2 177.5(2) . . . . ? 
C6 C7 C8 C13 -177.5(2) . . . . ? 
C14 C7 C8 C13 -1.3(4) . . . . ? 
C6 C7 C8 C9 0.1(2) . . . . ? 
C14 C7 C8 C9 176.2(2) . . . . ? 
C7 C6 N1 C9 2.1(2) . . . . ? 
C2 C6 N1 C9 -176.81(18) . . . . ? 
C7 C6 N1 C5 174.05(19) . . . . ? 
C2 C6 N1 C5 -4.9(3) . . . . ? 
C6 C7 C14 O1 178.8(2) . . . . ? 
C8 C7 C14 O1 3.2(4) . . . . ? 
C6 N1 C9 C10 176.3(2) . . . . ? 
C5 N1 C9 C10 4.2(3) . . . . ? 
C6 N1 C9 C8 -2.0(2) . . . . ? 
C5 N1 C9 C8 -174.16(19) . . . . ? 
C13 C8 C9 N1 179.17(18) . . . . ? 
C7 C8 C9 N1 1.2(2) . . . . ? 
C13 C8 C9 C10 0.7(3) . . . . ? 
C7 C8 C9 C10 -177.3(2) . . . . ? 
N1 C6 C2 C1 -105.0(2) . . . . ? 
C7 C6 C2 C1 76.4(3) . . . . ? 
N1 C6 C2 C3 20.5(3) . . . . ? 
C7 C6 C2 C3 -158.2(2) . . . . ? 
C4 C3 C2 C6 -48.6(3) . . . . ? 
C4 C3 C2 C1 74.3(3) . . . . ? 
C9 C8 C13 C12 -1.0(3) . . . . ? 
C7 C8 C13 C12 176.3(2) . . . . ? 
N1 C9 C10 C11 -177.7(2) . . . . ? 
C8 C9 C10 C11 0.5(3) . . . . ? 
C2 C3 C4 C5 62.7(3) . . . . ? 
C6 C2 C1 Cl1 -170.37(15) . . . . ? 
C3 C2 C1 Cl1 66.1(2) . . . . ? 
C6 N1 C5 C4 16.4(3) . . . . ? 
C9 N1 C5 C4 -172.74(19) . . . . ? 
C3 C4 C5 N1 -44.1(3) . . . . ? 
C8 C13 C12 C11 0.3(4) . . . . ? 
C9 C10 C11 C12 -1.2(4) . . . . ? 
C13 C12 C11 C10 0.9(4) . . . . ? 
  
_diffrn_measured_fraction_theta_max    0.959 
_diffrn_reflns_theta_full              28.19 
_diffrn_measured_fraction_theta_full   0.959 
_refine_diff_density_max    0.179 
_refine_diff_density_min   -0.228 
_refine_diff_density_rms    0.037 
